# Supplementary material for: Can Informal Savings Groups Promote Food Security and Social, Economic and Health Transformations, Especially among Women in Urban Sub-Saharan Africa: A Narrative Systematic Review
Source: MDPI journal article supplement (doi:10.3390/su14063153), 2022-03-08
Supplement: s1 [file s1]

Archive with 1 entries (1 files):
- sustainability-1609349-supplementary.pdf
