# Supplementary material for: Can Informal Savings Groups Promote Food Security and Social, Economic and Health Transformations, Especially among Women in Urban Sub-Saharan Africa: A Narrative Systematic Review
Source: MDPI journal article supplement (doi:10.3390/su14063153), 2022-03-08
Supplement: s1 [file s1 › sustainability-1609349-supplementary.pdf]

# Can Informal Savings Groups Promote Food Security and Social, Economic and Health Transformations, Especially among Women in Urban Sub-Saharan Africa: A Narrative Systematic Review

## Supplementary Materials

### “Savings for Health” IDRC collaborators (10)

Louise Foley <sup>1</sup>, Janetta Harbron <sup>2</sup>, James Lappeman <sup>3</sup>, Naomi Levitt <sup>4</sup>, Zandile Mchiza <sup>5</sup>, Kufre Okop <sup>6</sup>, Tolu Oni <sup>7</sup>, Whadi-ah Parker <sup>8</sup>, Thandi Puoane <sup>9</sup> and Pamela Wadende <sup>10</sup>

- <sup>1</sup> MRC Epidemiology Unit, University of Cambridge, CB2 0SP Cambridge, United Kingdom; louise.foley@mrcepid.cam.ac.uk
- <sup>2</sup> Research Centre for Health through Physical Activity, Lifestyle & Sport, Division of Physiological Sciences Dept of Human Biology, Faculty of Health Sciences, University of Cape Town, 7935 Cape Town, South Africa; janetta.harbron@uct.ac.za
- <sup>3</sup> UCT Liberty Institute of Strategic Marketing, University of Cape Town, 7935 Cape Town, South Africa; j.lappeman@uct.ac.za
- <sup>4</sup> Chronic Disease Initiative in Africa, Department of Medicine, Faculty of Health Sciences, University of Cape Town, 7935 Cape Town, South Africa; Naomi.levitt@uct.ac.za
- <sup>5</sup> Non-communicable Diseases Research Unit, South African Medical Research Council; 7505 Cape Town, South Africa; Zandile.mchiza@mrc.ac.za & jmchiza@uwc.ac.za
- <sup>6</sup> GCRF Accelerate Hub SUPER (Scaling Up Parenting Evaluation Research) Study | CSSR, Faculty of Humanities, University of Cape Town, 7701 Cape Town, South Africa; Kure.okop@uct.ac.za
- <sup>7</sup> MRC Epidemiology Unit Global Diet and Physical Activity Research Group, University of Cambridge & Research Initiative for Cities Health and Equity, University of Cape Town; 7925 Cape Town, South Africa; tolullah.oni@mrc-epid.cam.ac.uk
- <sup>8</sup> Human and Social Capabilities Division, Human Sciences Research Council, 0002 Pretoria, South Africa; wparker@hsrc.ac.za
- <sup>9</sup> School of Public Health, University of the Western Cape, 7535 Cape Town, South Africa; puoane@gmail.com
- <sup>10</sup> Department of Education. Kisii University, 408-40200 Kisii, Kenya; pamelawadende@gmail.com
